# Supplementary material
Source: PubMed Central journal article supplement (PMC3837795)
Supplement: AEM.02286-13_zam999104934so1.pdf [file AEM.02286-13_zam999104934so1.pdf]

### Legends to Supplemental Figures:

Figure S1. Neighbor-joining tree depicting the relationships of the sequences for the rickettsial 17-kDa gene of the rickettsiae in *Ixodes angustus* and those of other *Rickettsia* species. SFG, TRG and TG refer to the spotted fever group, transitional group and typhus group of *Rickettsia*, respectively. We have not included *R. helvetica* within the SFG based on the findings of a recent study [11] that considered the position of this species within the genus *Rickettsia* as *incertae sedis*. The scale bar represents the inferred substitutions per nucleotide site. The relative support for clades in the tree produced from the NJ and MP analyses are indicated above and below branches, respectively. The MP analysis of the same data set (i.e., 117 cladistically informative characters) produced over 1000 equally most-parsimonious trees (strict consensus tree not shown), with a length of 365, a CI of 0.69 and a RI of 0.73.

Figure S2. Neighbor-joining tree depicting the relationships of the outer membrane protein A gene (*ompA*) sequences for the rickettsiae in *Ixodes angustus* and those of other *Rickettsia* species. SFG and TRG refers to the spotted fever group and transitional group of *Rickettsia*, respectively. We have not included *R. helvetica* within the SFG based on the findings of a recent study [11] that considered the position of this species within the genus *Rickettsia* as *incertae sedis*. Representatives of the TG rickettsiae are not included because there are no *ompA* sequences for these taxa. The scale bar represents the inferred substitutions per nucleotide site. The relative support for clades in the tree produced from the NJ and MP analyses are indicated above and below branches, respectively. This clade also had 100% statistical support in the 30 equally most-parsimonious trees (length of 462, a CI of 0.67 and a RI of 0.77) based on 149 cladistically informative characters (tree not shown).

Figure S3. Neighbor-joining tree depicting the relationships of the citrate synthase gene (*gltA*) sequences for the rickettsiae in *Ixodes angustus* and those of other *Rickettsia* species. SFG, TRG and TG refer to the spotted fever group, transitional group and typhus group of *Rickettsia*, respectively. We have not included *R. helvetica* within the SFG based on the findings of a recent study [11] that considered the position of this species within the genus *Rickettsia* as *incertae sedis*. The scale bar represents the inferred substitutions per nucleotide site. The relative support for clades in the tree produced from the NJ and MP analyses are indicated above and below branches, respectively. The same clade was also strongly supported (98%) by the bootstrap analyses of the 84 equally most-parsimonious trees (length of 829, a CI of 0.71 and a RI of 0.73) based on 219 cladistically informative characters (tree not shown).

Figure S4. Neighbor-joining tree depicting the relationships of the surface cell antigen 1 gene (*sca1*) sequences for the rickettsiae in *Ixodes angustus* and those of other *Rickettsia* species. SFG, TRG and TG refer to the spotted fever group, transitional group and typhus group of *Rickettsia*, respectively. We have not included *R. helvetica* within the SFG based on the findings of a recent study [11] that considered the position of this species within the genus *Rickettsia* as *incertae sedis*. The scale bar represents the inferred substitutions per nucleotide site. The relative support for clades in the tree produced from the NJ and MP analyses are indicated above and below branches, respectively. The same clade was not supported by the bootstrap analyses of the 60 equally most-parsimonious trees (length of 262, a CI of 0.63 and a RI of 0.59) based on 85 cladistically informative characters (data not shown).

Figure S5. Neighbor-joining tree depicting the relationships of the sequences for the 16S-rRNA gene of the rickettsiae in *Ixodes angustus* and those of other *Rickettsia* species. SFG, TRG and TG refer to the spotted fever group, transitional group and typhus group of *Rickettsia*, respectively. We have not included *R. helvetica* within the SFG based on the findings of a recent study [11] that considered the position of this species within the genus *Rickettsia* as *incertae sedis*. The scale bar represents the inferred substitutions per nucleotide site. The relative support for clades in the tree produced from the NJ and MP analyses are indicated above and below branches, respectively.

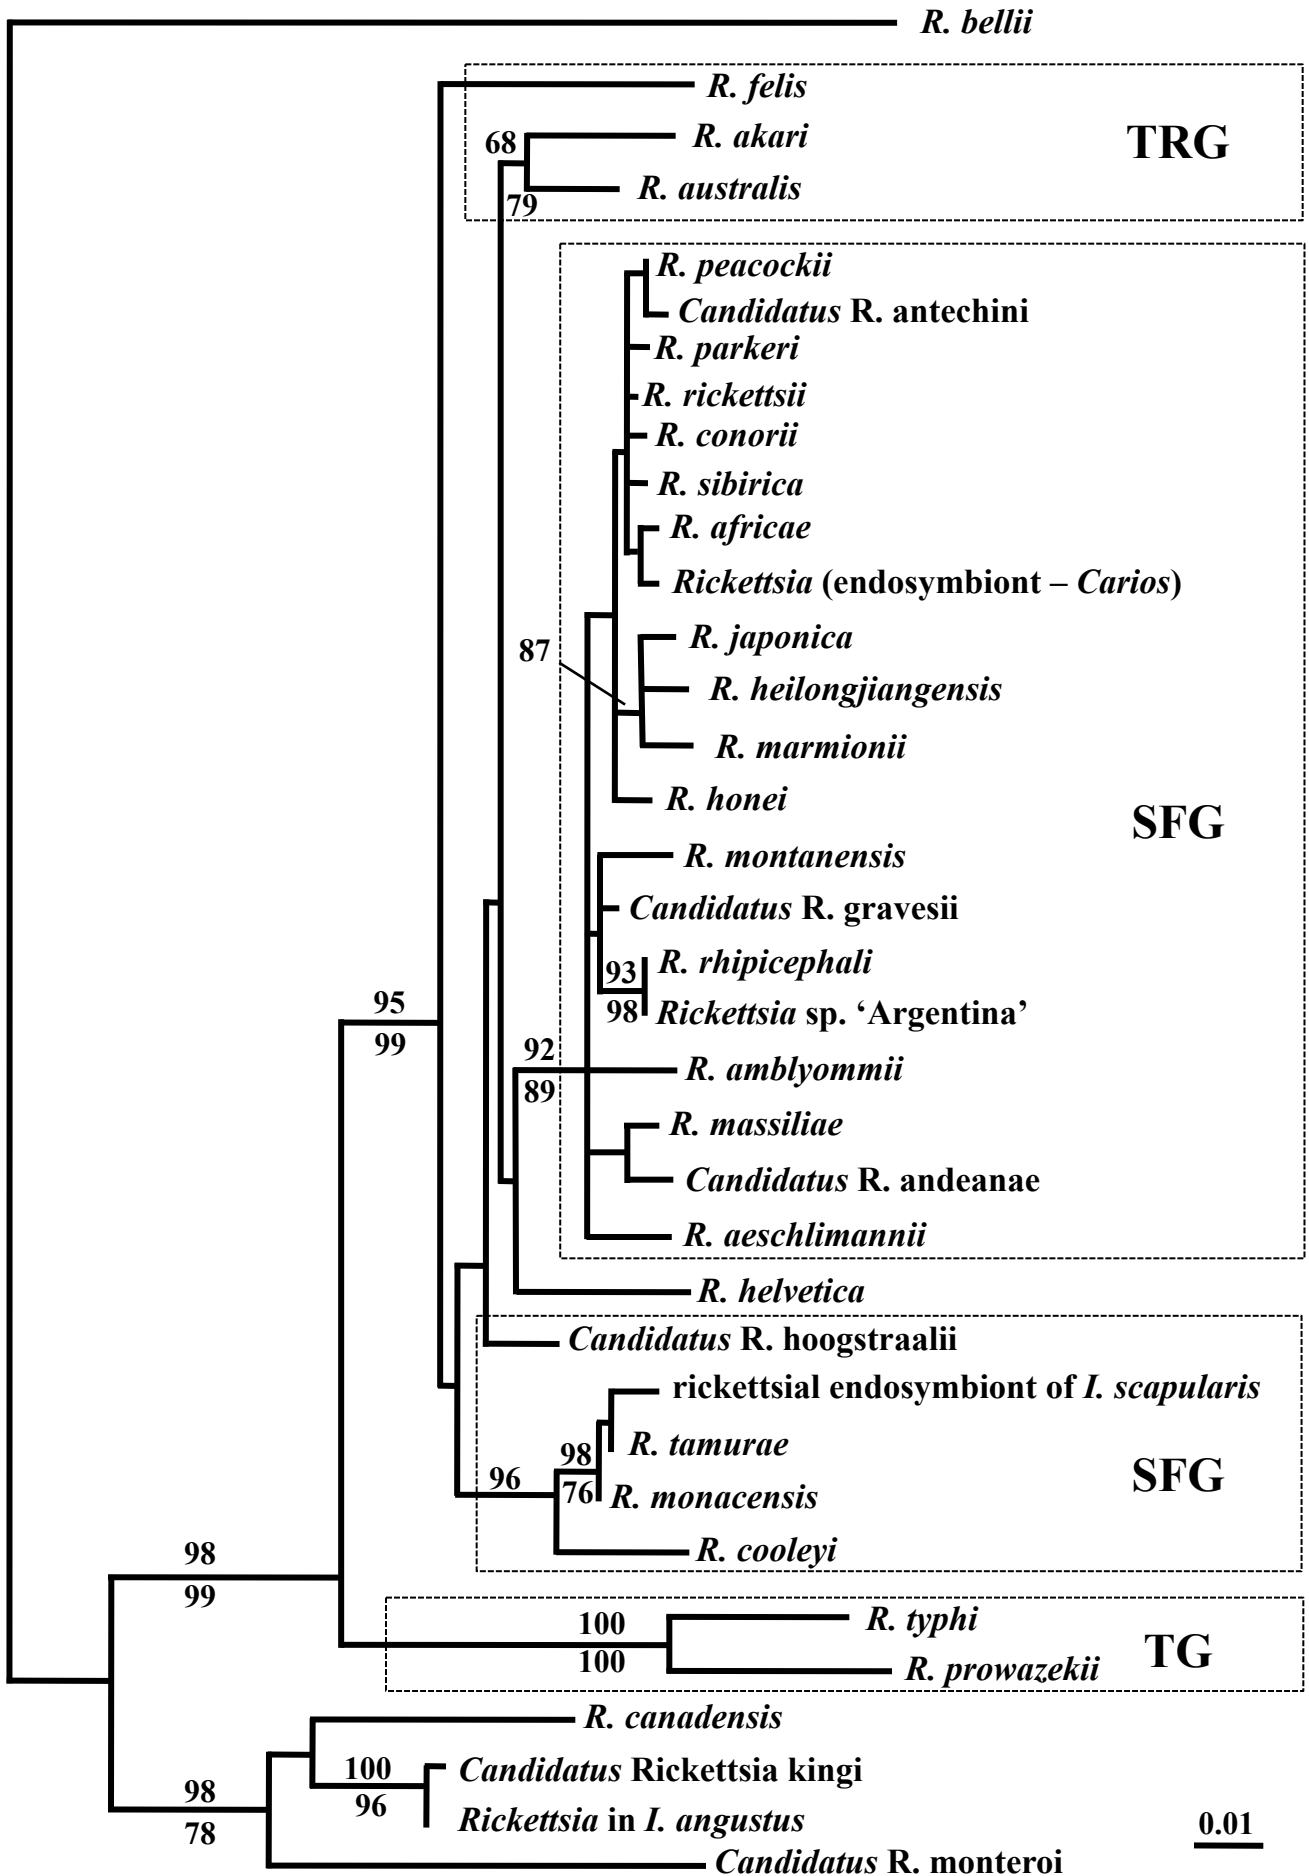

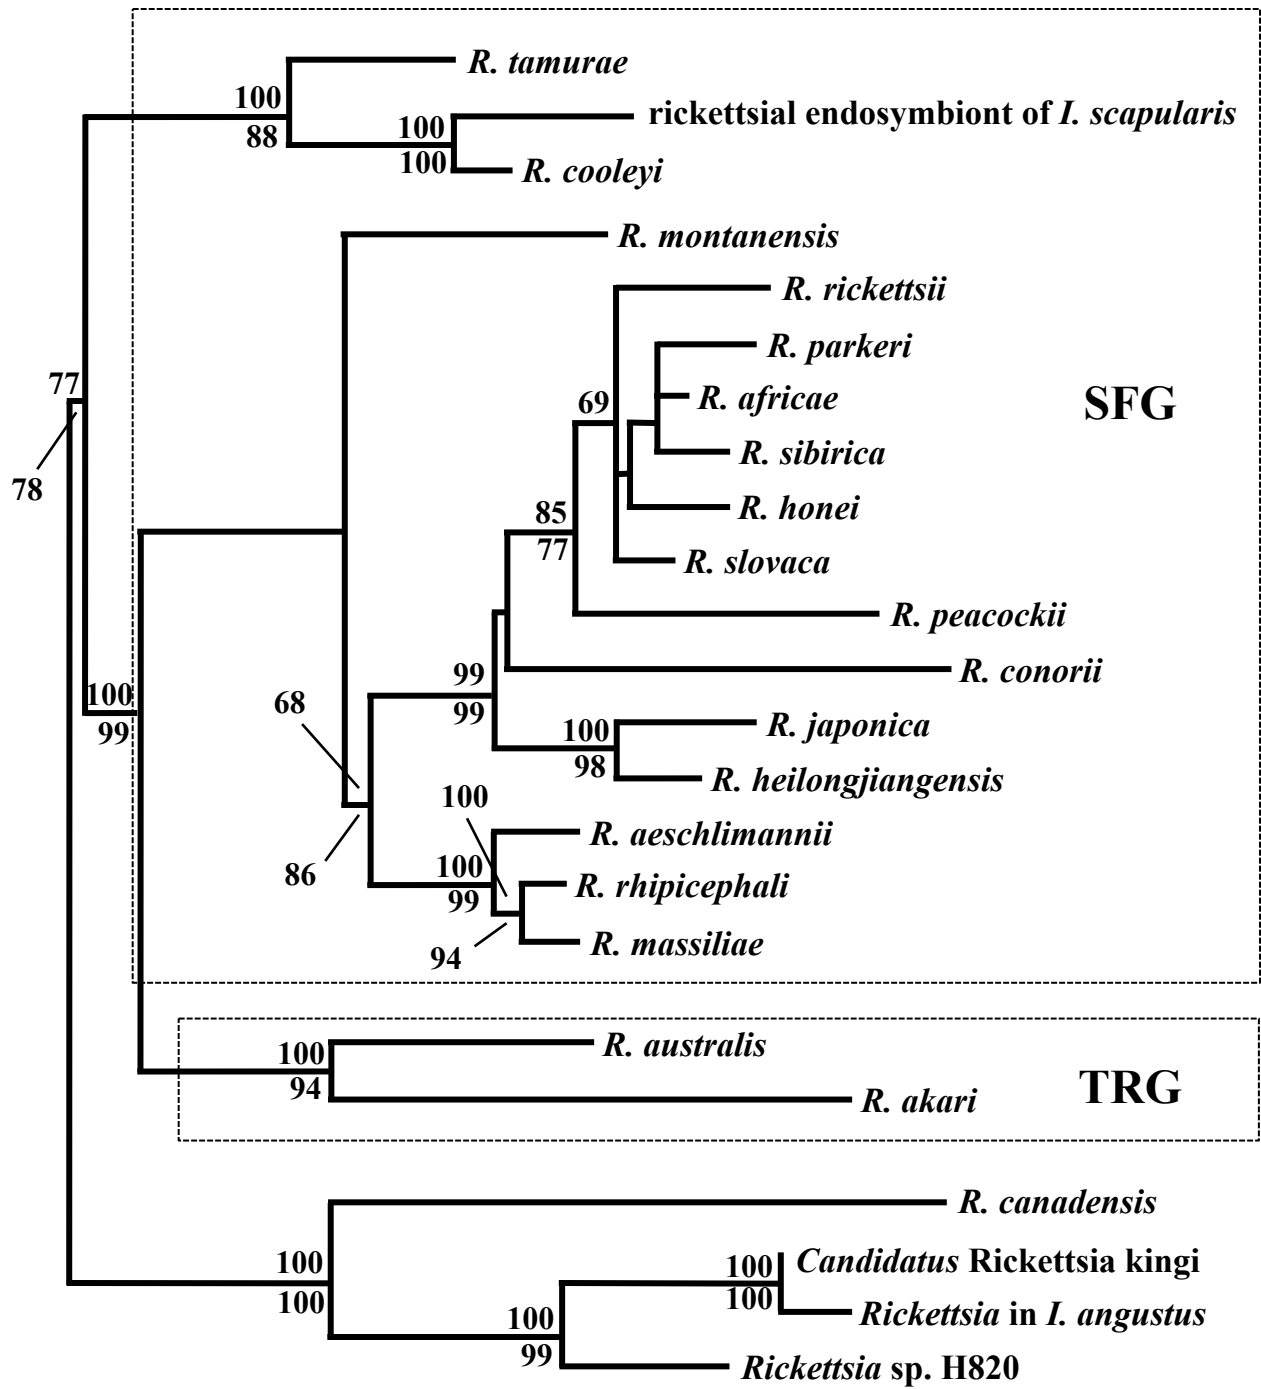

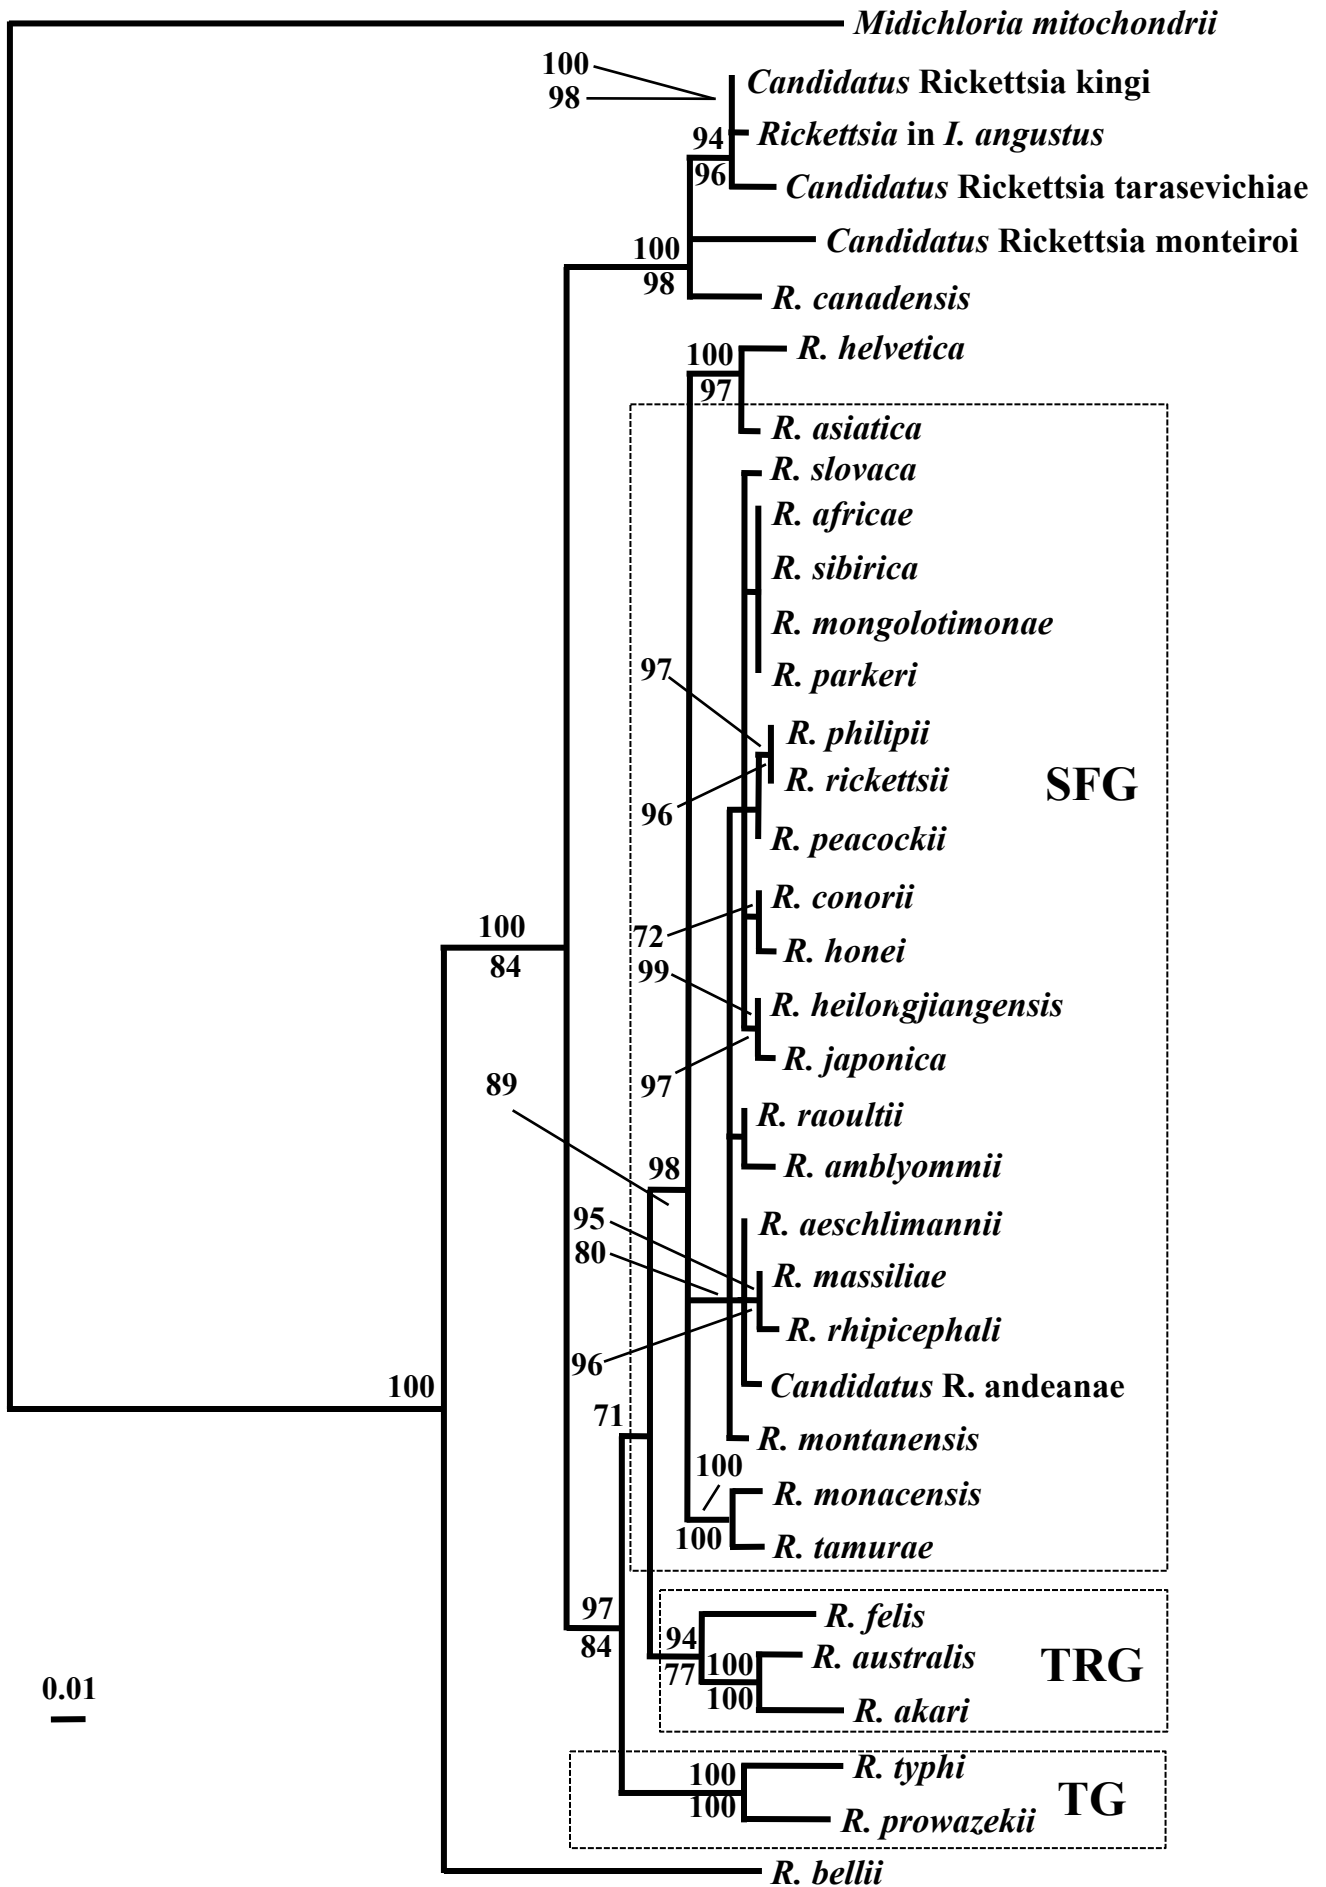

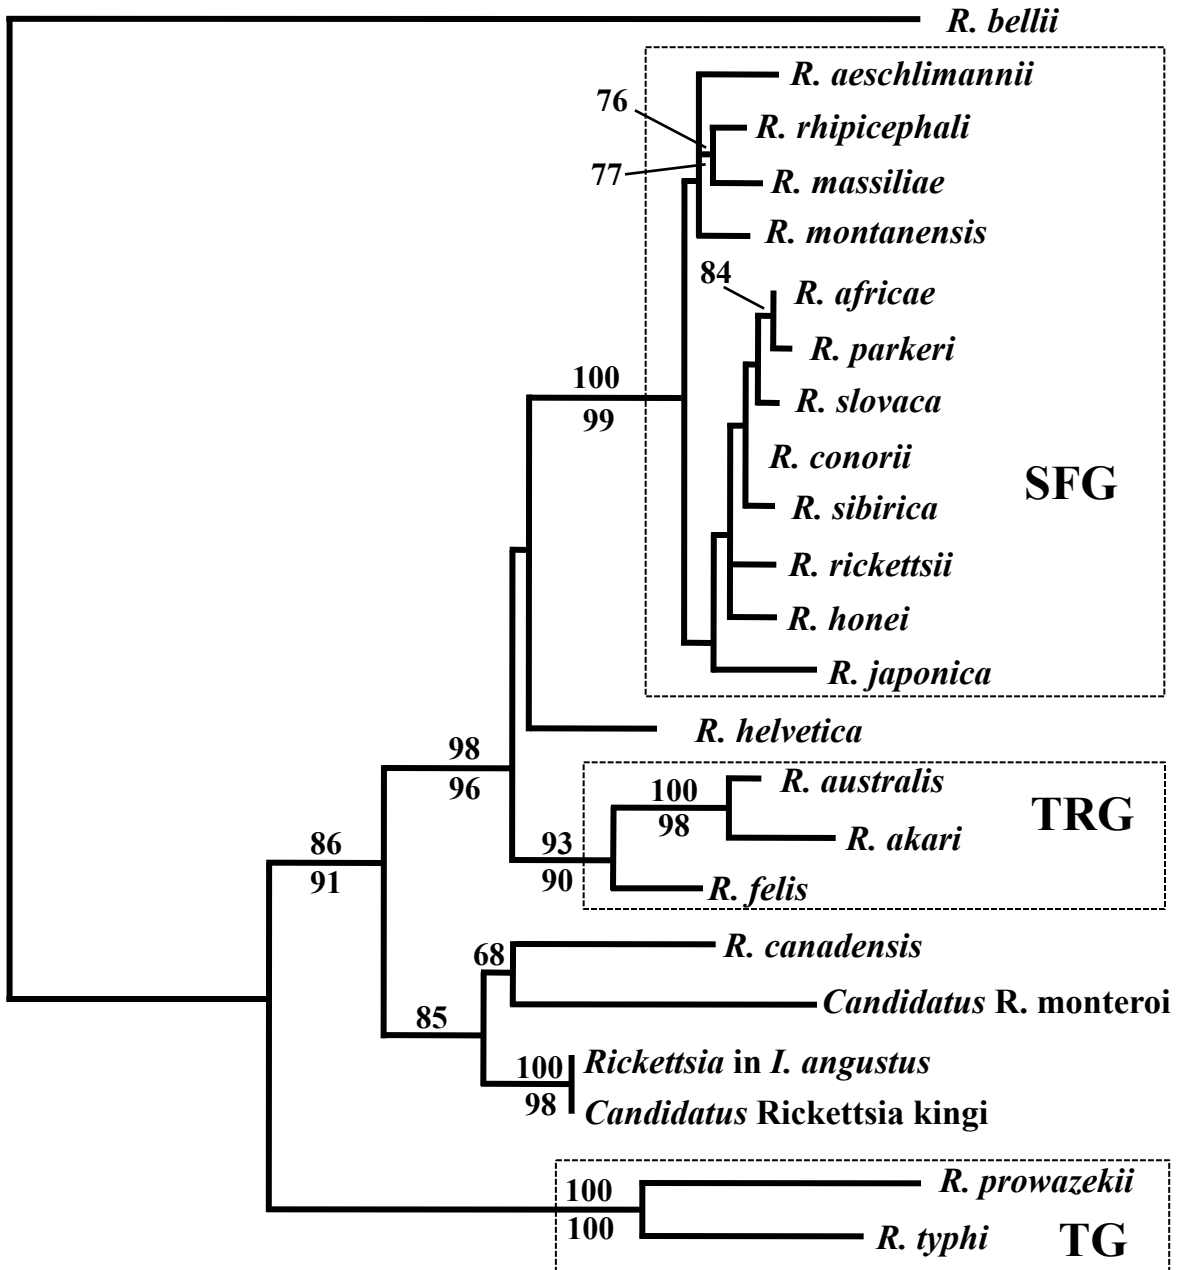

0.01

*Orientia tsutsugamushi*

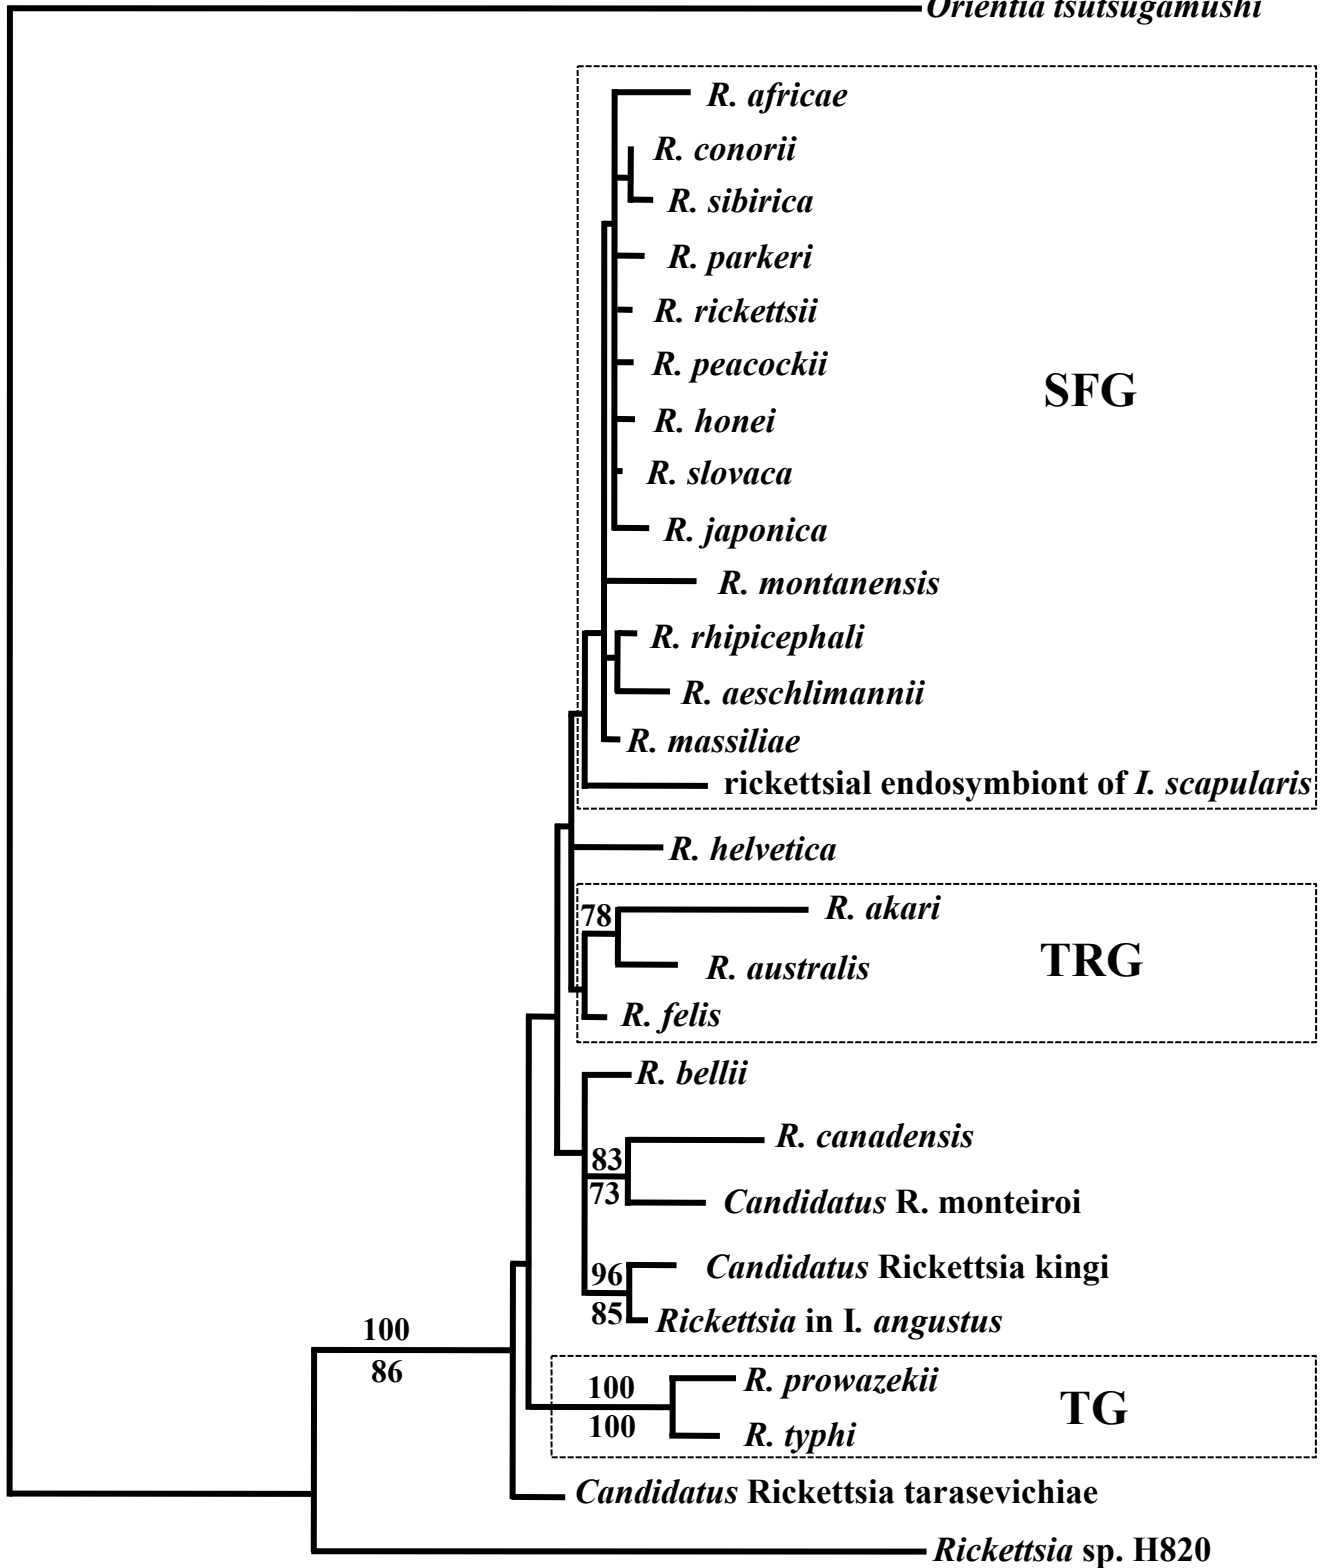

0.01



Supplemental TABLE 1: The GenBank accession numbers of the rickettsial DNA sequences used in phylogenetic analyses.

| Taxon                                       | 16S rRNA | 17-kDa    | Gene<br><i>gltA</i> | <i>ompA</i> | <i>sca1</i> |
|---------------------------------------------|----------|-----------|---------------------|-------------|-------------|
| <i>R. aeschlimannii</i>                     | U74757   | DQ3799979 | AY259084            | U43800      | DQ306900    |
| <i>R. africanae</i>                         | L36098   | CP001612  | U59733              | U43790      | DQ306901    |
| <i>R. akari</i>                             | L36099   | CP000847  | U59717              | CP000847    | DQ306902    |
| <i>R. amblyommii</i>                        | -        | AY375162  | -                   | -           | -           |
| <i>R. australis</i>                         | L36101   | M74042    | U59718              | AF149108    | DQ306903    |
| <i>R. bellii</i>                            | L36103   | AF445380  | U59716              | -           | DQ306904    |
| <i>R. canadensis</i>                        | L36104   | CP000409  | U59713              | CP000409    | DQ306905    |
| <i>R. conorii</i>                           | L36105   | AE006914  | U59730              | U43806      | DQ306906    |
| <i>R. cooley</i>                            | -        | AF031534  | -                   | -           | -           |
| <i>R. felis</i>                             | L28944   | CP000053  | AF210692            | -           | DQ306907    |
| <i>R. heilongjiangensis</i>                 | -        | AB473988  | AY280709            | AY280711    | -           |
| <i>R. helvetica</i>                         | L36212   | AF181036  | U59723              | -           | DQ306908    |
| <i>R. honei</i>                             | L36220   | AF027124  | U59726              | U43809      | DQ306909    |
| <i>R. japonica</i>                          | L36213   | D16515    | U59724              | U43795      | DQ306910    |
| <i>R. marmionii</i>                         | -        | AY737683  | -                   | -           | -           |
| <i>R. massiliae</i>                         | L36214   | CP000683  | U59719              | U43799      | DQ306911    |
| <i>R. monacensis</i>                        | -        | EF380355  | -                   | -           | -           |
| <i>R. montanensis</i>                       | L36215   | U11017    | U74756              | U43801      | DQ306912    |
| <i>R. parkeri</i>                           | L36673   | EF102237  | U59732              | U43802      | DQ306913    |
| <i>R. peacocki</i>                          | DQ062433 | CP001227  | DQ100162            | AY357766    | -           |
| <i>R. prowazekii</i>                        | M21789   | CP001584  | M17149              | -           | DQ306914    |
| <i>R. rhipicephali</i>                      | L36216   | DQ865207  | U59721              | U43803      | DQ306915    |
| <i>R. rickettsii</i>                        | L36217   | AY281069  | U59729              | U43804      | DQ306916    |
| <i>R. sibirica</i>                          | L36218   | AF445384  | U59734              | U43807      | DQ306918    |
| <i>R. slovacae</i>                          | L36224   | -         | -                   | U43808      | DQ306917    |
| <i>R. tamurae</i>                           | -        | AB114825  | AY394896            | AB114823    | -           |
| <i>R. typhi</i>                             | L36221   | AE017197  | U59714              | -           | DQ306919    |
| <i>R. endosymbiont of Ixodes scapularis</i> | D84558   | EF689734  | -                   | EF689735    | -           |
| <i>R. endosymbiont of Carios kelleyi</i>    | -        | AY763102  | -                   | -           | -           |
| <i>Rickettsia</i> sp. 'Argentina'           | -        | EU826507  | -                   | -           | -           |
| <i>Candidatus R. andreanae</i>              | -        | GU395295  | -                   | -           | -           |
| <i>Candidatus R. antechini</i>              | -        | DQ372953  | -                   | -           | -           |
| <i>Candidatus R. gravesii</i>               | -        | DQ269436  | -                   | -           | -           |
| <i>Candidatus R. hoogstraalii</i>           | -        | EF629538  | -                   | -           | -           |
| <i>Candidatus R. kingi</i>                  | HF935068 | HF935071  | HF935074            | HF935077    | HF935080    |
| <i>Candidatus R. monteiroi</i>              | FJ269037 | FJ269036  | FJ269035            | -           | JF734727    |
| <i>Candidatus R. tarasevichiae</i>          | AF503168 | -         | AF503167            | -           | -           |
| Undescribed <i>Rickettsia</i> sp. 'H820'    | JF714221 | -         | -                   | JF714220    | -           |
